# Supplementary material
Source: PubMed Central journal article supplement (PMC2604773)
Supplement: table_s2.pdf [file table_s2.pdf]

Table S2

| Smal PFGE Pattern | Year Isolated | PFGE assigned Epidemic Type | Predicted PFGE Epidemic Type using spa typing | PVL PCR         | Province | SpaType      | RepeatSuccession                   |
|-------------------|---------------|-----------------------------|-----------------------------------------------|-----------------|----------|--------------|------------------------------------|
| 54                | 2007          | CMRSA4                      | CMRSA4                                        | Negative        | NL       | t012         | r15r12r16r02r16r02r25r17r24r24     |
| 473               | 2007          | CMRSA10                     | CMRSA10                                       | <b>Positive</b> | NL       | t008         | r11r19r12r21r17r34r24r34r22r25     |
| 54                | 2007          | CMRSA4                      | CMRSA4                                        | Negative        | NL       | t012         | r15r12r16r02r16r02r25r17r24r24     |
| 546               | 2007          | CMRSA2                      | CMRSA2                                        | Negative        | NL       | t002         | r26r23r17r34r17r20r17r12r17r16     |
| 994               | 2007          | none                        | CMRSA1                                        | Negative        | NL       | t004         | r09r02r16r13r13r17r34r16r34        |
| 1780              | 2007          | CMRSA2                      | CMRSA2                                        | Negative        | NL       | t548         | r26r23r17r34r17r20r17r12r16        |
| 704               | 2007          | CMRSA4                      | CMRSA4                                        | Negative        | NL       | t012         | r15r12r16r02r16r02r25r17r24r24     |
| 560               | 2007          | CMRSA2                      | CMRSA2                                        | Negative        | NL       | t002         | r26r23r17r34r17r20r17r12r17r16     |
| 546               | 2007          | CMRSA2                      | CMRSA2                                        | Negative        | NL       | t002         | r26r23r17r34r17r20r17r12r17r16     |
| 546               | 2007          | CMRSA2                      | CMRSA2                                        | Negative        | NL       | t002         | r26r23r17r34r17r20r17r12r17r16     |
| 923               | 2007          | CMRSA2                      | CMRSA2                                        | Negative        | ON       | t002         | r26r23r17r34r17r20r17r12r17r16     |
| 1781              | 2007          | CMRSA2                      | CMRSA2                                        | Negative        | ON       | t002         | r26r23r17r34r17r20r17r12r17r16     |
| 2                 | 2007          | CMRSA1                      | CMRSA1                                        | Negative        | ON       | t004         | r09r02r16r13r13r17r34r16r34        |
| 923               | 2007          | CMRSA2                      | CMRSA2                                        | Negative        | ON       | t003         | r26r17r20r17r12r17r17r16           |
| 1419              | 2007          | CMRSA2                      | CMRSA2                                        | Negative        | ON       | t002         | r26r23r17r34r17r20r17r12r17r16     |
| 473               | 2007          | CMRSA10                     | CMRSA10                                       | <b>Positive</b> | ON       | t008         | r11r19r12r21r17r34r24r34r22r25     |
| 923               | 2007          | CMRSA2                      | CMRSA2                                        | Negative        | ON       | t002         | r26r23r17r34r17r20r17r12r17r16     |
| 834               | 2007          | CMRSA2                      | CMRSA2                                        | Negative        | ON       | t002         | r26r23r17r34r17r20r17r12r17r16     |
| 1530              | 2007          | CMRSA2                      | CMRSA2                                        | Negative        | ON       | t548         | r26r23r17r34r17r20r17r12r16        |
| 923               | 2007          | CMRSA2                      | CMRSA2                                        | Negative        | ON       | t002         | r26r23r17r34r17r20r17r12r17r16     |
| 923               | 2007          | CMRSA2                      | CMRSA2                                        | Negative        | ON       | t002         | r26r23r17r34r17r20r17r12r17r16     |
| 923               | 2007          | CMRSA2                      | CMRSA2                                        | Negative        | ON       | t088         | r26r23r17r34r17r20r17r12r12r17r16  |
| 1606              | 2007          | CMRSA2                      | CMRSA2                                        | Negative        | ON       | t002         | r26r23r17r34r17r20r17r12r17r16     |
| 473               | 2007          | CMRSA10                     | CMRSA10                                       | <b>Positive</b> | ON       | t008         | r11r19r12r21r17r34r24r34r22r25     |
| 2                 | 2007          | CMRSA1                      | CMRSA1                                        | Negative        | ON       | t004         | r09r02r16r13r13r17r34r16r34        |
| 413               | 2007          | CMRSA2                      | CMRSA2                                        | Negative        | NL       | t002         | r26r23r17r34r17r20r17r12r17r16     |
| 1793              | 2007          | CMRSA4                      | CMRSA4                                        | Negative        | NL       | t012         | r15r12r16r02r16r02r25r17r24r24     |
| 546               | 2007          | CMRSA2                      | CMRSA2                                        | Negative        | NL       | t002         | r26r23r17r34r17r20r17r12r17r16     |
| 1037              | 2007          | CMRSA2                      | CMRSA2                                        | Negative        | NL       | t002         | r26r23r17r34r17r20r17r12r17r16     |
| 546               | 2007          | CMRSA2                      | CMRSA2                                        | Negative        | NL       | t002         | r26r23r17r34r17r20r17r12r17r16     |
| 546               | 2007          | CMRSA2                      | CMRSA2                                        | Negative        | NL       | t002         | r26r23r17r34r17r20r17r12r17r16     |
| 546               | 2007          | CMRSA2                      | CMRSA2                                        | Negative        | NL       | t002         | r26r23r17r34r17r20r17r12r17r16     |
| 473               | 2007          | CMRSA10                     | <b>CMRSA10-New Type</b>                       | <b>Positive</b> | BC       | <b>t3135</b> | <b>r11r19r34r24r34r24r34r22r25</b> |
| 473               | 2007          | CMRSA10                     | CMRSA10                                       | <b>Positive</b> | ON       | t008         | r11r19r12r21r17r34r24r34r22r25     |

| Smal PFGE Pattern | Year Isolated | PFGE assigned Epidemic Type | Predicted PFGE Epidemic Type using spa typing | PVL PCR         | Province | SpaType     | RepeatSuccession                   |
|-------------------|---------------|-----------------------------|-----------------------------------------------|-----------------|----------|-------------|------------------------------------|
| 1792              | 2007          | "European" ST80             | <b>"European" ST80</b>                        | Positive        | ON       | t044        | r07r23r12r34r34r33r34              |
| 1741              | 2007          | CMRSA2                      | CMRSA2                                        | Negative        | ON       | t002        | r26r23r17r34r17r20r17r12r17r16     |
| 1791              | 2007          | CMRSA6                      | CMRSA6                                        | Negative        | MB       | t037        | r15r12r16r02r25r17r24              |
| 594               | 2007          | CMRSA2                      | CMRSA2                                        | Negative        | MB       | t002        | r26r23r17r34r17r20r17r12r17r16     |
| 38                | 2007          | CMRSA2                      | CMRSA2                                        | Negative        | MB       | t002        | r26r23r17r34r17r20r17r12r17r16     |
| 443               | 2007          | CMRSA2                      | CMRSA2                                        | Negative        | MB       | t002        | r26r23r17r34r17r20r17r12r17r16     |
| 917               | 2007          | CMRSA2                      | CMRSA2                                        | Negative        | MB       | t002        | r26r23r17r34r17r20r17r12r17r16     |
| 47                | 2007          | CMRSA2                      | CMRSA2                                        | Negative        | MB       | t002        | r26r23r17r34r17r20r17r12r17r16     |
| 142               | 2007          | CMRSA7                      | CMRSA7                                        | Positive        | MB       | t128        | r07r23r23r21r16r34r33r13           |
| 142               | 2007          | CMRSA7                      | CMRSA7                                        | Negative        | MB       | t128        | r07r23r23r21r16r34r33r13           |
| 443               | 2007          | CMRSA2                      | CMRSA2                                        | Negative        | MB       | t002        | r26r23r17r34r17r20r17r12r17r16     |
| 142               | 2007          | CMRSA7                      | CMRSA7                                        | Positive        | MB       | t128        | r07r23r23r21r16r34r33r13           |
| 1794              | 2007          | CMRSA2                      | CMRSA2                                        | Negative        | MB       | t1080       | r26r23r17r34r17r20r17r34r17r16     |
| 473               | 2007          | CMRSA10                     | CMRSA10                                       | <b>Positive</b> | MB       | t008        | r11r19r12r21r17r34r24r34r22r25     |
| 142               | 2007          | CMRSA7                      | CMRSA7                                        | Positive        | MB       | t128        | r07r23r23r21r16r34r33r13           |
| 142               | 2007          | CMRSA7                      | CMRSA7                                        | Negative        | MB       | t128        | r07r23r23r21r16r34r33r13           |
| 473               | 2007          | CMRSA10                     | CMRSA10                                       | <b>Positive</b> | BC       | t008        | r11r19r12r21r17r34r24r34r22r25     |
| 68                | 2007          | CMRSA6                      | CMRSA6                                        | Negative        | BC       | t037        | r15r12r16r02r25r17r24              |
| 473               | 2007          | CMRSA10                     | CMRSA10                                       | <b>Positive</b> | BC       | t008        | r11r19r12r21r17r34r24r34r22r25     |
| 68                | 2007          | CMRSA6                      | CMRSA6                                        | Negative        | BC       | t037        | r15r12r16r02r25r17r24              |
| 1759              | 2007          | CMRSA6                      | CMRSA6                                        | Negative        | BC       | t037        | r15r12r16r02r25r17r24              |
| 625               | 2007          | CMRSA2                      | CMRSA2                                        | Negative        | SK       | t002        | r26r23r17r34r17r20r17r12r17r16     |
| 142               | 2007          | CMRSA7                      | CMRSA7                                        | Positive        | SK       | t128        | r07r23r23r21r16r34r33r13           |
| 68                | 2007          | CMRSA6                      | CMRSA6                                        | Negative        | SK       | t037        | r15r12r16r02r25r17r24              |
| 142               | 2007          | CMRSA7                      | CMRSA7                                        | Positive        | SK       | t128        | r07r23r23r21r16r34r33r13           |
| 142               | 2007          | CMRSA7                      | <b>CMRSA7-New Type</b>                        | Positive        | SK       | <b>t555</b> | <b>r07r23r23r23r21r16r34r33r13</b> |
| 142               | 2007          | CMRSA7                      | CMRSA7                                        | Positive        | SK       | t127        | r07r23r21r16r34r33r13              |
| 68                | 2007          | CMRSA6                      | CMRSA6                                        | Negative        | SK       | t037        | r15r12r16r02r25r17r24              |
| 142               | 2007          | CMRSA7                      | CMRSA7                                        | Positive        | SK       | t127        | r07r23r21r16r34r33r13              |
| 68                | 2007          | CMRSA6                      | CMRSA6                                        | Negative        | SK       | t037        | r15r12r16r02r25r17r24              |
| 841               | 2007          | CMRSA2                      | CMRSA2                                        | Negative        | NS       | t002        | r26r23r17r34r17r20r17r12r17r16     |
| 1625              | 2007          | CMRSA10                     | CMRSA10                                       | <b>Positive</b> | QC       | t008        | r11r19r12r21r17r34r24r34r22r25     |
| 1311              | 2007          | CMRSA2                      | CMRSA2                                        | Negative        | QC       | t002        | r26r23r17r34r17r20r17r12r17r16     |
| 1028              | 2007          | CMRSA10                     | CMRSA10                                       | <b>Positive</b> | QC       | t008        | r11r19r12r21r17r34r24r34r22r25     |

| Smal PFGE Pattern | Year Isolated | PFGE assigned Epidemic Type | Predicted PFGE Epidemic Type using spa typing | PVL PCR         | Province | SpaType      | RepeatSuccession                   |
|-------------------|---------------|-----------------------------|-----------------------------------------------|-----------------|----------|--------------|------------------------------------|
| 1798              | 2007          | CMRSA2                      | CMRSA2                                        | Negative        | QC       | t002         | r26r23r17r34r17r20r17r12r17r16     |
| 473               | 2007          | CMRSA10                     | <b>CMRSA10-New Type</b>                       | Positive        | BC       | <b>t3154</b> | <b>r11r19r12r21r17r34r24r05r25</b> |
| 546               | 2007          | CMRSA2                      | CMRSA2                                        | Negative        | NL       | t002         | r26r23r17r34r17r20r17r12r17r16     |
| 557               | 2007          | CMRSA2                      | CMRSA2                                        | Negative        | NL       | t002         | r26r23r17r34r17r20r17r12r17r16     |
| 546               | 2007          | CMRSA2                      | CMRSA2                                        | Negative        | NL       | t002         | r26r23r17r34r17r20r17r12r17r16     |
| 473               | 2007          | CMRSA10                     | CMRSA10                                       | <b>Positive</b> | NL       | t008         | r11r19r12r21r17r34r24r34r22r25     |
| 704               | 2007          | CMRSA4                      | CMRSA4                                        | Positive        | NL       | t012         | r15r12r16r02r16r02r25r17r24r24     |
| 546               | 2007          | CMRSA2                      | CMRSA2                                        | Negative        | NL       | t002         | r26r23r17r34r17r20r17r12r17r16     |
| 546               | 2007          | CMRSA2                      | CMRSA2                                        | Negative        | NL       | t002         | r26r23r17r34r17r20r17r12r17r16     |
| 1799              | 2007          | CMRSA4                      | CMRSA4                                        | Negative        | NL       | t012         | r15r12r16r02r16r02r25r17r24r24     |
| 546               | 2007          | CMRSA2                      | CMRSA2                                        | Negative        | NL       | t002         | r26r23r17r34r17r20r17r12r17r16     |
| 923               | 2007          | CMRSA2                      | CMRSA2                                        | Negative        | NL       | t002         | r26r23r17r34r17r20r17r12r17r16     |
| 473               | 2007          | CMRSA10                     | CMRSA10                                       | <b>Positive</b> | ON       | t008         | r11r19r12r21r17r34r24r34r22r25     |
| 923               | 2007          | CMRSA2                      | CMRSA2                                        | Negative        | ON       | t002         | r26r23r17r34r17r20r17r12r17r16     |
| 473               | 2007          | CMRSA10                     | CMRSA10                                       | <b>Positive</b> | ON       | t008         | r11r19r12r21r17r34r24r34r22r25     |
| 1615              | 2007          | none                        | CMRSA2                                        | Negative        | ON       | t002         | r26r23r17r34r17r20r17r12r17r16     |
| 1614              | 2007          | CMRSA2                      | CMRSA2                                        | Negative        | ON       | t002         | r26r23r17r34r17r20r17r12r17r16     |
| 473               | 2007          | CMRSA10                     | CMRSA10                                       | <b>Positive</b> | ON       | t008         | r11r19r12r21r17r34r24r34r22r25     |
| 903               | 2007          | CMRSA2                      | CMRSA2                                        | Negative        | ON       | t002         | r26r23r17r34r17r20r17r12r17r16     |
| 2                 | 2007          | CMRSA1                      | CMRSA1                                        | Negative        | ON       | t266         | r09r02r16r13r13r13r17r34r16r34     |
| 443               | 2007          | CMRSA2                      | CMRSA2                                        | Negative        | ON       | t002         | r26r23r17r34r17r20r17r12r17r16     |
| 204               | 2007          | CMRSA2                      | CMRSA2                                        | Negative        | NL       | t002         | r26r23r17r34r17r20r17r12r17r16     |
| 546               | 2007          | CMRSA2                      | CMRSA2                                        | Negative        | NL       | t002         | r26r23r17r34r17r20r17r12r17r16     |
| 903               | 2007          | CMRSA2                      | CMRSA2                                        | Negative        | NL       | t002         | r26r23r17r34r17r20r17r12r17r16     |
| 204               | 2007          | CMRSA2                      | CMRSA2                                        | Negative        | NL       | t002         | r26r23r17r34r17r20r17r12r17r16     |
| 557               | 2007          | CMRSA2                      | CMRSA2                                        | Negative        | NL       | t002         | r26r23r17r34r17r20r17r12r17r16     |
| 546               | 2007          | CMRSA2                      | CMRSA2                                        | Negative        | NL       | t002         | r26r23r17r34r17r20r17r12r17r16     |
| 1800              | 2007          | CMRSA2                      | CMRSA2                                        | Negative        | NL       | t002         | r26r23r17r34r17r20r17r12r17r16     |
| 68                | 2007          | CMRSA6                      | CMRSA6                                        | Negative        | SK       | t037         | r15r12r16r02r25r17r24              |
| 423               | 2007          | CMRSA2                      | CMRSA2                                        | Negative        | SK       | t002         | r26r23r17r34r17r20r17r12r17r16     |
| 68                | 2007          | CMRSA6                      | CMRSA6                                        | Negative        | SK       | t037         | r15r12r16r02r25r17r24              |
| 1050              | 2007          | CMRSA2                      | CMRSA2                                        | Negative        | QC       | t002         | r26r23r17r34r17r20r17r12r17r16     |
| 1444              | 2007          | CMRSA10                     | CMRSA10                                       | <b>Positive</b> | QC       | t008         | r11r19r12r21r17r34r24r34r22r25     |
| 1530              | 2007          | CMRSA2                      | CMRSA2                                        | Negative        | QC       | t002         | r26r23r17r34r17r20r17r12r17r16     |

| Smal PFGE Pattern | Year Isolated | PFGE assigned Epidemic Type | Predicted PFGE Epidemic Type using spa typing | PVL PCR         | Province | SpaType | RepeatSuccession                  |
|-------------------|---------------|-----------------------------|-----------------------------------------------|-----------------|----------|---------|-----------------------------------|
| 1311              | 2007          | CMRSA2                      | CMRSA2                                        | Negative        | QC       | t002    | r26r23r17r34r17r20r17r12r17r16    |
| 669               | 2007          | CMRSA2                      | CMRSA2                                        | Negative        | QC       | t002    | r26r23r17r34r17r20r17r12r17r16    |
| 1801              | 2007          | none                        | none                                          | Negative        | QC       | t186    | r07r12r21r17r13r13r34r34r33r34    |
| 1530              | 2007          | CMRSA2                      | CMRSA2                                        | Negative        | QC       | t002    | r26r23r17r34r17r20r17r12r17r16    |
| 669               | 2007          | CMRSA2                      | CMRSA2                                        | Negative        | QC       | t002    | r26r23r17r34r17r20r17r12r17r16    |
| 1197              | 2007          | CMRSA2                      | CMRSA2                                        | Negative        | QC       | t002    | r26r23r17r34r17r20r17r12r17r16    |
| 1083              | 2007          | CMRSA2                      | CMRSA2                                        | Negative        | ON       | t002    | r26r23r17r34r17r20r17r12r17r16    |
| 1803              | 2007          | CMRSA2                      | CMRSA2                                        | Negative        | ON       | t088    | r26r23r17r34r17r20r17r12r12r17r16 |
| 1732              | 2007          | CMRSA2                      | CMRSA2                                        | Negative        | ON       | t002    | r26r23r17r34r17r20r17r12r17r16    |
| 1304              | 2007          | CMRSA2                      | CMRSA2                                        | Negative        | ON       | t002    | r26r23r17r34r17r20r17r12r17r16    |
| 1304              | 2007          | CMRSA2                      | CMRSA2                                        | Negative        | ON       | t002    | r26r23r17r34r17r20r17r12r17r16    |
| 1804              | 2007          | none                        | CMRSA2                                        | Negative        | ON       | t088    | r26r23r17r34r17r20r17r12r12r17r16 |
| 1083              | 2007          | CMRSA2                      | CMRSA2                                        | Negative        | ON       | t002    | r26r23r17r34r17r20r17r12r17r16    |
| 1802              | 2007          | CMRSA2                      | CMRSA2                                        | Negative        | ON       | t002    | r26r23r17r34r17r20r17r12r17r16    |
| 1083              | 2007          | CMRSA2                      | CMRSA2                                        | Negative        | ON       | t002    | r26r23r17r34r17r20r17r12r17r16    |
| 443               | 2007          | CMRSA2                      | CMRSA2                                        | Negative        | ON       | t002    | r26r23r17r34r17r20r17r12r17r16    |
| 1304              | 2007          | CMRSA2                      | CMRSA2                                        | Negative        | ON       | t002    | r26r23r17r34r17r20r17r12r17r16    |
| 1452              | 2007          | none                        | none                                          | Negative        | ON       | t216    | r04r20r17r20r17r31r16r34          |
| 645               | 2007          | CMRSA7                      | CMRSA7                                        | Negative        | ON       | t128    | r07r23r23r21r16r34r33r13          |
| 944               | 2007          | CMRSA2                      | CMRSA2                                        | Negative        | ON       | t003    | r26r17r20r17r12r17r17r16          |
| 1304              | 2007          | CMRSA2                      | CMRSA2                                        | Negative        | ON       | t002    | r26r23r17r34r17r20r17r12r17r16    |
| 903               | 2007          | CMRSA2                      | CMRSA2                                        | Negative        | ON       | t002    | r26r23r17r34r17r20r17r12r17r16    |
| 552               | 2007          | CMRSA2                      | CMRSA2                                        | Negative        | ON       | t002    | r26r23r17r34r17r20r17r12r17r16    |
| 903               | 2007          | CMRSA2                      | CMRSA2                                        | Negative        | ON       | t954    | r26r23r17r34r17r17r16             |
| 1304              | 2007          | CMRSA2                      | CMRSA2                                        | Negative        | ON       | t002    | r26r23r17r34r17r20r17r12r17r16    |
| 473               | 2007          | CMRSA10                     | CMRSA10                                       | <b>Positive</b> | ON       | t008    | r11r19r12r21r17r34r24r34r22r25    |
| 443               | 2007          | CMRSA2                      | CMRSA2                                        | Negative        | ON       | t002    | r26r23r17r34r17r20r17r12r17r16    |
| 927               | 2007          | CMRSA2                      | CMRSA2                                        | Negative        | ON       | t002    | r26r23r17r34r17r20r17r12r17r16    |
| 927               | 2007          | CMRSA2                      | CMRSA2                                        | Negative        | ON       | t002    | r26r23r17r34r17r20r17r12r17r16    |
| 473               | 2007          | CMRSA10                     | CMRSA10                                       | <b>Positive</b> | ON       | t008    | r11r19r12r21r17r34r24r34r22r25    |
| 1462              | 2007          | CMRSA2                      | CMRSA2                                        | Negative        | NL       | t002    | r26r23r17r34r17r20r17r12r17r16    |
| 546               | 2007          | CMRSA2                      | CMRSA2                                        | Negative        | NL       | t002    | r26r23r17r34r17r20r17r12r17r16    |
| 546               | 2007          | CMRSA2                      | CMRSA2                                        | Negative        | NL       | t002    | r26r23r17r34r17r20r17r12r17r16    |
| 557               | 2007          | CMRSA2                      | CMRSA2                                        | Negative        | NL       | t002    | r26r23r17r34r17r20r17r12r17r16    |

| Smal PFGE Pattern | Year Isolated | PFGE assigned Epidemic Type | Predicted PFGE Epidemic Type using spa typing | PVL PCR         | Province | SpaType      | RepeatSuccession                      |
|-------------------|---------------|-----------------------------|-----------------------------------------------|-----------------|----------|--------------|---------------------------------------|
| 704               | 2007          | CMRSA4                      | CMRSA4                                        | Negative        | NL       | t012         | r15r12r16r02r16r02r25r17r24r24        |
| 546               | 2007          | CMRSA2                      | CMRSA2                                        | Negative        | NL       | t002         | r26r23r17r34r17r20r17r12r17r16        |
| 790               | 2007          | CMRSA2                      | CMRSA2                                        | Negative        | NL       | t002         | r26r23r17r34r17r20r17r12r17r16        |
| 546               | 2007          | CMRSA2                      | CMRSA2                                        | Negative        | NL       | t002         | r26r23r17r34r17r20r17r12r17r16        |
| 790               | 2007          | CMRSA2                      | CMRSA2                                        | Negative        | NL       | t002         | r26r23r17r34r17r20r17r12r17r16        |
| 54                | 2007          | CMRSA4                      | CMRSA4                                        | Negative        | NL       | t012         | r15r12r16r02r16r02r25r17r24r24        |
| 1772              | 2007          | CMRSA3                      | CMRSA3                                        | Negative        | AB       | t037         | r15r12r16r02r25r17r24                 |
| 68                | 2007          | CMRSA6                      | CMRSA6                                        | Negative        | AB       | t037         | r15r12r16r02r25r17r24                 |
| 708               | 2007          | CMRSA2                      | CMRSA2                                        | Negative        | AB       | t002         | r26r23r17r34r17r20r17r12r17r16        |
| 473               | 2007          | CMRSA10                     | CMRSA10                                       | <b>Positive</b> | AB       | t008         | r11r19r12r21r17r34r24r34r22r25        |
| 708               | 2007          | CMRSA2                      | CMRSA2                                        | Negative        | AB       | t002         | r26r23r17r34r17r20r17r12r17r16        |
| 68                | 2007          | CMRSA6                      | CMRSA6                                        | Negative        | AB       | t037         | r15r12r16r02r25r17r24                 |
| 473               | 2007          | CMRSA10                     | CMRSA10                                       | <b>Positive</b> | AB       | t008         | r11r19r12r21r17r34r24r34r22r25        |
| 68                | 2007          | CMRSA6                      | CMRSA6                                        | Negative        | AB       | t037         | r15r12r16r02r25r17r24                 |
| 1259              | 2007          | CMRSA10                     | CMRSA10                                       | Positive        | AB       | t818         | r11r19r12r21r17r34                    |
| 1796              | 2007          | CMRSA10                     | <b>CMRSA10-New Type</b>                       | Positive        | AB       | <b>t2067</b> | <b>r11r19r12r21r16r34r24r34r22r25</b> |
| 473               | 2007          | CMRSA10                     | CMRSA10                                       | <b>Positive</b> | AB       | t008         | r11r19r12r21r17r34r24r34r22r25        |
| 473               | 2007          | CMRSA10                     | CMRSA10                                       | <b>Positive</b> | AB       | t008         | r11r19r12r21r17r34r24r34r22r25        |
| 176               | 2007          | CMRSA7                      | CMRSA7                                        | Positive        | AB       | t128         | r07r23r23r21r16r34r33r13              |
| 1028              | 2007          | CMRSA10                     | CMRSA10                                       | <b>Positive</b> | AB       | t008         | r11r19r12r21r17r34r24r34r22r25        |
| 68                | 2007          | CMRSA6                      | CMRSA6                                        | Negative        | AB       | t037         | r15r12r16r02r25r17r24                 |
| 68                | 2007          | CMRSA6                      | CMRSA6                                        | Negative        | AB       | t037         | r15r12r16r02r25r17r24                 |
| 68                | 2007          | CMRSA6                      | CMRSA6                                        | Negative        | AB       | t037         | r15r12r16r02r25r17r24                 |
| 68                | 2007          | CMRSA6                      | CMRSA6                                        | Negative        | AB       | t037         | r15r12r16r02r25r17r24                 |
| 1797              | 2007          | none                        | <b>CMRSA2-New Type</b>                        | Negative        | AB       | <b>t688</b>  | <b>r26r23r17r34r17r16</b>             |
| 68                | 2007          | CMRSA6                      | CMRSA6                                        | Negative        | AB       | t037         | r15r12r16r02r25r17r24                 |
| 919               | 2007          | CMRSA2                      | CMRSA2                                        | Negative        | AB       | t242         | r26r23r17r13r17r20r17r12r17r16        |
| 443               | 2007          | CMRSA2                      | CMRSA2                                        | Negative        | ON       | t002         | r26r23r17r34r17r20r17r12r17r16        |
| 591               | 2007          | CMRSA2                      | CMRSA2                                        | Negative        | ON       | t002         | r26r23r17r34r17r20r17r12r17r16        |
| 18                | 2007          | CMRSA2                      | CMRSA2                                        | Negative        | ON       | t002         | r26r23r17r34r17r20r17r12r17r16        |
| 30                | 2007          | CMRSA2                      | CMRSA2                                        | Negative        | ON       | t003         | r26r17r20r17r12r17r17r16              |
| 1028              | 2007          | CMRSA10                     | CMRSA10                                       | <b>Positive</b> | ON       | t008         | r11r19r12r21r17r34r24r34r22r25        |
| 473               | 2007          | CMRSA10                     | CMRSA10                                       | <b>Positive</b> | BC       | t008         | r11r19r12r21r17r34r24r34r22r25        |
| 473               | 2007          | CMRSA10                     | CMRSA10                                       | <b>Positive</b> | BC       | t008         | r11r19r12r21r17r34r24r34r22r25        |

| Smal PFGE Pattern | Year Isolated | PFGE assigned Epidemic Type | Predicted PFGE Epidemic Type using spa typing | PVL PCR         | Province | SpaType | RepeatSuccession                     |
|-------------------|---------------|-----------------------------|-----------------------------------------------|-----------------|----------|---------|--------------------------------------|
| 1091              | 2007          | CMRSA10                     | CMRSA10                                       | <b>Positive</b> | BC       | t008    | r11r19r12r21r17r34r24r34r22r25       |
| 473               | 2007          | CMRSA10                     | CMRSA10                                       | Positive        | ON       | t024    | r11r12r21r17r34r24r34r22r25          |
| 552               | 2007          | CMRSA2                      | CMRSA2                                        | Negative        | ON       | t002    | r26r23r17r34r17r20r17r12r17r16       |
| 552               | 2007          | CMRSA2                      | CMRSA2                                        | Negative        | ON       | t2066   | r26r23r17r34r17r20r17r12r17r12r17r16 |
| 1304              | 2007          | CMRSA2                      | CMRSA2                                        | Negative        | ON       | t002    | r26r23r17r34r17r20r17r12r17r16       |
| 552               | 2007          | CMRSA2                      | CMRSA2                                        | Negative        | ON       | t002    | r26r23r17r34r17r20r17r12r17r16       |
| 1606              | 2007          | CMRSA2                      | CMRSA2                                        | Negative        | ON       | t002    | r26r23r17r34r17r20r17r12r17r16       |
| 1301              | 2007          | CMRSA2                      | CMRSA2                                        | Negative        | ON       | t002    | r26r23r17r34r17r20r17r12r17r16       |
| 1452              | 2007          | none                        | none                                          | Negative        | ON       | t216    | r04r20r17r20r17r31r16r34             |
| 18                | 2007          | CMRSA2                      | CMRSA2                                        | Negative        | ON       | t002    | r26r23r17r34r17r20r17r12r17r16       |
| 1606              | 2007          | CMRSA2                      | CMRSA2                                        | Negative        | ON       | t002    | r26r23r17r34r17r20r17r12r17r16       |
| 473               | 2007          | CMRSA10                     | CMRSA10                                       | Positive        | ON       | t190    | r11r17r34r24r34r22r25                |
| 18                | 2007          | CMRSA2                      | CMRSA2                                        | Negative        | ON       | t002    | r26r23r17r34r17r20r17r12r17r16       |
| 473               | 2007          | CMRSA10                     | CMRSA10                                       | <b>Positive</b> | ON       | t008    | r11r19r12r21r17r34r24r34r22r25       |
| 1705              | 2007          | ST59 CA-MRSA                | <b>ST59 CA-MRSA Clone</b>                     | Positive        | ON       | t437    | r04r20r17r20r17r25r34                |
| 1606              | 2007          | CMRSA2                      | CMRSA2                                        | Negative        | ON       | t002    | r26r23r17r34r17r20r17r12r17r16       |
| 18                | 2007          | CMRSA2                      | CMRSA2                                        | Negative        | ON       | t002    | r26r23r17r34r17r20r17r12r17r16       |
| 1625              | 2007          | CMRSA10                     | CMRSA10                                       | <b>Positive</b> | QC       | t008    | r11r19r12r21r17r34r24r34r22r25       |
| 1311              | 2007          | CMRSA2                      | CMRSA2                                        | Negative        | QC       | t002    | r26r23r17r34r17r20r17r12r17r16       |
| 1311              | 2007          | CMRSA2                      | CMRSA2                                        | Negative        | QC       | t002    | r26r23r17r34r17r20r17r12r17r16       |
| 1856              | 2007          | CMRSA10                     | CMRSA10                                       | <b>Positive</b> | QC       | t008    | r11r19r12r21r17r34r24r34r22r25       |
| 1311              | 2007          | CMRSA2                      | CMRSA2                                        | Negative        | QC       | t002    | r26r23r17r34r17r20r17r12r17r16       |
| 1671              | 2007          | CMRSA2                      | CMRSA2                                        | Negative        | QC       | t002    | r26r23r17r34r17r20r17r12r17r16       |
| 708               | 2007          | CMRSA2                      | CMRSA2                                        | Negative        | QC       | t002    | r26r23r17r34r17r20r17r12r17r16       |
| 552               | 2007          | CMRSA2                      | CMRSA2                                        | Negative        | NL       | t002    | r26r23r17r34r17r20r17r12r17r16       |
| 546               | 2007          | CMRSA2                      | CMRSA2                                        | Negative        | NL       | t002    | r26r23r17r34r17r20r17r12r17r16       |
| 546               | 2007          | CMRSA2                      | CMRSA2                                        | Negative        | NL       | t002    | r26r23r17r34r17r20r17r12r17r16       |
| 704               | 2007          | CMRSA4                      | CMRSA4                                        | Negative        | NL       | t012    | r15r12r16r02r16r02r25r17r24r24       |
| 552               | 2007          | CMRSA2                      | CMRSA2                                        | Negative        | NL       | t002    | r26r23r17r34r17r20r17r12r17r16       |
| 1389              | 2007          | none                        | CMRSA2                                        | Negative        | NL       | t002    | r26r23r17r34r17r20r17r12r17r16       |
| 1713              | 2007          | none                        | CMRSA2                                        | Negative        | NL       | t002    | r26r23r17r34r17r20r17r12r17r16       |
| 546               | 2007          | CMRSA2                      | CMRSA2                                        | Negative        | NL       | t002    | r26r23r17r34r17r20r17r12r17r16       |
| 1389              | 2007          | none                        | CMRSA2                                        | Negative        | NL       | t002    | r26r23r17r34r17r20r17r12r17r16       |
| 1389              | 2007          | none                        | CMRSA2                                        | Negative        | NL       | t002    | r26r23r17r34r17r20r17r12r17r16       |

| Smal PFGE Pattern | Year Isolated | PFGE assigned Epidemic Type | Predicted PFGE Epidemic Type using spa typing | PVL PCR         | Province | SpaType      | RepeatSuccession                         |
|-------------------|---------------|-----------------------------|-----------------------------------------------|-----------------|----------|--------------|------------------------------------------|
| 612               | 2007          | CMRSA2                      | CMRSA2                                        | Negative        | NL       | t002         | r26r23r17r34r17r20r17r12r17r16           |
| 546               | 2007          | CMRSA2                      | CMRSA2                                        | Negative        | NL       | t002         | r26r23r17r34r17r20r17r12r17r16           |
| 546               | 2007          | CMRSA2                      | CMRSA2                                        | Negative        | NL       | t002         | r26r23r17r34r17r20r17r12r17r16           |
| 546               | 2007          | CMRSA2                      | CMRSA2                                        | Negative        | NL       | t002         | r26r23r17r34r17r20r17r12r17r16           |
| 1762              | 2007          | none                        | CMRSA2                                        | Negative        | NL       | t002         | r26r23r17r34r17r20r17r12r17r16           |
| 557               | 2007          | CMRSA2                      | CMRSA2                                        | Negative        | NL       | t002         | r26r23r17r34r17r20r17r12r17r16           |
| 546               | 2007          | CMRSA2                      | CMRSA2                                        | Negative        | NL       | t002         | r26r23r17r34r17r20r17r12r17r16           |
| 591               | 2007          | CMRSA2                      | CMRSA2                                        | Negative        | ON       | t002         | r26r23r17r34r17r20r17r12r17r16           |
| 2                 | 2007          | CMRSA1                      | CMRSA1                                        | Negative        | ON       | t004         | r09r02r16r13r13r17r34r16r34              |
| 1396              | 2007          | CMRSA10                     | CMRSA10                                       | <b>Positive</b> | ON       | t008         | r11r19r12r21r17r34r24r34r22r25           |
| 1197              | 2007          | CMRSA2                      | CMRSA2                                        | Negative        | ON       | t002         | r26r23r17r34r17r20r17r12r17r16           |
| 1786              | 2007          | none                        | none                                          | Negative        | ON       | t186         | r07r12r21r17r13r13r34r34r33r34           |
| 473               | 2007          | CMRSA10                     | CMRSA10                                       | <b>Positive</b> | BC       | t008         | r11r19r12r21r17r34r24r34r22r25           |
| 473               | 2007          | CMRSA10                     | CMRSA10                                       | <b>Positive</b> | SK       | t008         | r11r19r12r21r17r34r24r34r22r25           |
| 68                | 2007          | CMRSA6                      | CMRSA6                                        | Negative        | SK       | t037         | r15r12r16r02r25r17r24                    |
| 142               | 2007          | CMRSA7                      | <b>CMRSA7-New Type</b>                        | Positive        | SK       | <b>t2593</b> | <b>r07r23r21r34r33r13</b>                |
| 68                | 2007          | CMRSA6                      | CMRSA6                                        | Negative        | SK       | t037         | r15r12r16r02r25r17r24                    |
| 591               | 2007          | CMRSA2                      | CMRSA2                                        | Negative        | BC       | t002         | r26r23r17r34r17r20r17r12r17r16           |
| 18                | 2007          | CMRSA2                      | CMRSA2                                        | Negative        | BC       | t002         | r26r23r17r34r17r20r17r12r17r16           |
| 1857              | 2007          | CMRSA2                      | CMRSA2                                        | Negative        | BC       | t002         | r26r23r17r34r17r20r17r12r17r16           |
| 473               | 2007          | CMRSA10                     | <b>CMRSA10-New Type</b>                       | Positive        | BC       | <b>t068</b>  | <b>r11r19r19r12r21r17r34r24r34r22r25</b> |
| 1082              | 2007          | CMRSA2                      | CMRSA2                                        | Negative        | BC       | t002         | r26r23r17r34r17r20r17r12r17r16           |
| 68                | 2007          | CMRSA6                      | CMRSA6                                        | Negative        | BC       | t037         | r15r12r16r02r25r17r24                    |
| 591               | 2007          | CMRSA2                      | CMRSA2                                        | Negative        | BC       | t002         | r26r23r17r34r17r20r17r12r17r16           |
| 473               | 2007          | CMRSA10                     | CMRSA10                                       | <b>Positive</b> | BC       | t008         | r11r19r12r21r17r34r24r34r22r25           |
| 1638              | 2007          | CMRSA2                      | CMRSA2                                        | Negative        | BC       | t002         | r26r23r17r34r17r20r17r12r17r16           |
| 1703              | 2007          | CMRSA2                      | CMRSA2                                        | Negative        | BC       | t002         | r26r23r17r34r17r20r17r12r17r16           |
| 1091              | 2007          | CMRSA10                     | CMRSA10                                       | <b>Positive</b> | BC       | t008         | r11r19r12r21r17r34r24r34r22r25           |
| 997               | 2007          | CMRSA6                      | CMRSA6                                        | Negative        | BC       | t037         | r15r12r16r02r25r17r24                    |
| 1631              | 2007          | CMRSA10                     | CMRSA10                                       | <b>Positive</b> | BC       | t008         | r11r19r12r21r17r34r24r34r22r25           |
| 473               | 2007          | CMRSA10                     | CMRSA10                                       | <b>Positive</b> | BC       | t008         | r11r19r12r21r17r34r24r34r22r25           |
| 473               | 2007          | CMRSA10                     | CMRSA10                                       | <b>Positive</b> | BC       | t008         | r11r19r12r21r17r34r24r34r22r25           |
| 1580              | 2007          | CMRSA10                     | CMRSA10                                       | <b>Positive</b> | BC       | t008         | r11r19r12r21r17r34r24r34r22r25           |
| 68                | 2007          | CMRSA6                      | CMRSA6                                        | Negative        | BC       | t037         | r15r12r16r02r25r17r24                    |

| Smal PFGE Pattern | Year Isolated | PFGE assigned Epidemic Type | Predicted PFGE Epidemic Type using spa typing | PVL PCR         | Province | SpaType      | RepeatSuccession                      |
|-------------------|---------------|-----------------------------|-----------------------------------------------|-----------------|----------|--------------|---------------------------------------|
| 1673              | 2007          | CMRSA6                      | CMRSA6                                        | Negative        | BC       | t037         | r15r12r16r02r25r17r24                 |
| 591               | 2007          | CMRSA2                      | CMRSA2                                        | Negative        | BC       | t002         | r26r23r17r34r17r20r17r12r17r16        |
| 68                | 2007          | CMRSA6                      | CMRSA6                                        | Negative        | BC       | t037         | r15r12r16r02r25r17r24                 |
| 1580              | 2007          | CMRSA10                     | CMRSA10                                       | <b>Positive</b> | BC       | t008         | r11r19r12r21r17r34r24r34r22r25        |
| 1091              | 2007          | CMRSA10                     | CMRSA10                                       | <b>Positive</b> | BC       | t008         | r11r19r12r21r17r34r24r34r22r25        |
| 1703              | 2007          | CMRSA2                      | CMRSA2                                        | Negative        | BC       | t002         | r26r23r17r34r17r20r17r12r17r16        |
| 473               | 2007          | CMRSA10                     | CMRSA10                                       | <b>Positive</b> | BC       | t008         | r11r19r12r21r17r34r24r34r22r25        |
| 473               | 2007          | CMRSA10                     | CMRSA10                                       | <b>Positive</b> | BC       | t008         | r11r19r12r21r17r34r24r34r22r25        |
| 1875              | 2007          | CMRSA10                     | CMRSA10                                       | Positive        | BC       | t1635        | r11r19r12r21r17r34r25                 |
| 473               | 2007          | CMRSA10                     | CMRSA10                                       | <b>Positive</b> | BC       | t008         | r11r19r12r21r17r34r24r34r22r25        |
| 591               | 2007          | CMRSA2                      | CMRSA2                                        | Negative        | BC       | t002         | r26r23r17r34r17r20r17r12r17r16        |
| 591               | 2007          | CMRSA2                      | CMRSA2                                        | Negative        | BC       | t002         | r26r23r17r34r17r20r17r12r17r16        |
| 473               | 2007          | CMRSA10                     | CMRSA10                                       | <b>Positive</b> | BC       | t008         | r11r19r12r21r17r34r24r34r22r25        |
| 1335              | 2007          | CMRSA10                     | <b>CMRSA10-New Type</b>                       | Positive        | BC       | <b>t1767</b> | <b>r11r19r12r21r17r34r24r34r22r25</b> |
| 68                | 2007          | CMRSA6                      | CMRSA6                                        | Negative        | BC       | t037         | r15r12r16r02r25r17r24                 |
| 1703              | 2007          | CMRSA2                      | CMRSA2                                        | Negative        | BC       | t002         | r26r23r17r34r17r20r17r12r17r16        |
| 1703              | 2007          | CMRSA2                      | CMRSA2                                        | Negative        | BC       | t002         | r26r23r17r34r17r20r17r12r17r16        |
| 473               | 2007          | CMRSA10                     | CMRSA10                                       | <b>Positive</b> | BC       | t008         | r11r19r12r21r17r34r24r34r22r25        |
| 68                | 2007          | CMRSA6                      | CMRSA6                                        | Negative        | BC       | t037         | r15r12r16r02r25r17r24                 |
| 591               | 2007          | CMRSA2                      | CMRSA2                                        | Negative        | BC       | t002         | r26r23r17r34r17r20r17r12r17r16        |
| 1876              | 2007          | CMRSA10                     | CMRSA10                                       | <b>Positive</b> | BC       | t008         | r11r19r12r21r17r34r24r34r22r25        |
| 473               | 2007          | CMRSA10                     | CMRSA10                                       | <b>Positive</b> | BC       | t008         | r11r19r12r21r17r34r24r34r22r25        |
| 1703              | 2007          | CMRSA2                      | CMRSA2                                        | Negative        | BC       | t002         | r26r23r17r34r17r20r17r12r17r16        |
| 473               | 2007          | CMRSA10                     | CMRSA10                                       | <b>Positive</b> | BC       | t008         | r11r19r12r21r17r34r24r34r22r25        |
| 1138              | 2007          | CMRSA10                     | CMRSA10                                       | <b>Positive</b> | BC       | t008         | r11r19r12r21r17r34r24r34r22r25        |
| 473               | 2007          | CMRSA10                     | CMRSA10                                       | <b>Positive</b> | BC       | t008         | r11r19r12r21r17r34r24r34r22r25        |
| 473               | 2007          | CMRSA10                     | CMRSA10                                       | <b>Positive</b> | ON       | t008         | r11r19r12r21r17r34r24r34r22r25        |
| 1304              | 2007          | CMRSA2                      | CMRSA2                                        | Negative        | ON       | t002         | r26r23r17r34r17r20r17r12r17r16        |
| 1304              | 2007          | CMRSA2                      | CMRSA2                                        | Negative        | ON       | t002         | r26r23r17r34r17r20r17r12r17r16        |
| 1855              | 2007          | none                        | <b>Required PFGE (CMRSA9)</b>                 | <b>Negative</b> | ON       | t008         | r11r19r12r21r17r34r24r34r22r25        |
| 473               | 2007          | CMRSA10                     | CMRSA10                                       | <b>Positive</b> | ON       | t008         | r11r19r12r21r17r34r24r34r22r25        |
| 1304              | 2007          | CMRSA2                      | CMRSA2                                        | Negative        | ON       | t002         | r26r23r17r34r17r20r17r12r17r16        |
| 38                | 2007          | CMRSA2                      | CMRSA2                                        | Negative        | ON       | t002         | r26r23r17r34r17r20r17r12r17r16        |
| 18                | 2007          | CMRSA2                      | CMRSA2                                        | Negative        | ON       | t002         | r26r23r17r34r17r20r17r12r17r16        |



| Smal PFGE Pattern | Year Isolated | PFGE assigned Epidemic Type | Predicted PFGE Epidemic Type using spa typing | PVL PCR  | Province | SpaType | RepeatSuccession               |
|-------------------|---------------|-----------------------------|-----------------------------------------------|----------|----------|---------|--------------------------------|
| 1304              | 2007          | CMRSA2                      | CMRSA2                                        | Negative | ON       | t002    | r26r23r17r34r17r20r17r12r17r16 |
| 1304              | 2007          | CMRSA2                      | CMRSA2                                        | Negative | ON       | t002    | r26r23r17r34r17r20r17r12r17r16 |
| 1304              | 2007          | CMRSA2                      | CMRSA2                                        | Negative | ON       | t002    | r26r23r17r34r17r20r17r12r17r16 |
| 1304              | 2007          | CMRSA2                      | CMRSA2                                        | Negative | ON       | t002    | r26r23r17r34r17r20r17r12r17r16 |
| 1606              | 2007          | CMRSA2                      | CMRSA2                                        | Negative | ON       | t002    | r26r23r17r34r17r20r17r12r17r16 |
| 1606              | 2007          | CMRSA2                      | CMRSA2                                        | Negative | ON       | t002    | r26r23r17r34r17r20r17r12r17r16 |
| 919               | 2007          | CMRSA2                      | CMRSA2                                        | Negative | NB       | t002    | r26r23r17r34r17r20r17r12r17r16 |
| 859               | 2007          | CMRSA2                      | CMRSA2                                        | Negative | NB       | t067    | r26r23r17r34r17r20r17r12r17    |
| 903               | 2007          | CMRSA2                      | CMRSA2                                        | Negative | NB       | t002    | r26r23r17r34r17r20r17r12r17r16 |
| 601               | 2007          | CMRSA2                      | CMRSA2                                        | Negative | NB       | t002    | r26r23r17r34r17r20r17r12r17r16 |
| 164               | 2007          | CMRSA2                      | CMRSA2                                        | Negative | NB       | t002    | r26r23r17r34r17r20r17r12r17r16 |
| 546               | 2007          | CMRSA2                      | CMRSA2                                        | Negative | NL       | t002    | r26r23r17r34r17r20r17r12r17r16 |
| 546               | 2007          | CMRSA2                      | CMRSA2                                        | Negative | NL       | t002    | r26r23r17r34r17r20r17r12r17r16 |
| 14                | 2007          | CMRSA2                      | CMRSA2                                        | Negative | NL       | t002    | r26r23r17r34r17r20r17r12r17r16 |
| 1389              | 2007          | none                        | CMRSA2                                        | Negative | NL       | t002    | r26r23r17r34r17r20r17r12r17r16 |
| 1234              | 2007          | CMRSA2                      | CMRSA2                                        | Negative | NL       | t002    | r26r23r17r34r17r20r17r12r17r16 |
| 546               | 2007          | CMRSA2                      | CMRSA2                                        | Negative | NL       | t002    | r26r23r17r34r17r20r17r12r17r16 |
| 546               | 2007          | CMRSA2                      | CMRSA2                                        | Negative | NL       | t002    | r26r23r17r34r17r20r17r12r17r16 |
| 528               | 2007          | CMRSA2                      | CMRSA2                                        | Negative | NL       | t002    | r26r23r17r34r17r20r17r12r17r16 |
| 528               | 2007          | CMRSA2                      | CMRSA2                                        | Negative | NL       | t002    | r26r23r17r34r17r20r17r12r17r16 |
| 546               | 2007          | CMRSA2                      | CMRSA2                                        | Negative | NL       | t002    | r26r23r17r34r17r20r17r12r17r16 |
| 546               | 2007          | CMRSA2                      | CMRSA2                                        | Negative | NL       | t002    | r26r23r17r34r17r20r17r12r17r16 |
| 620               | 2007          | CMRSA2                      | CMRSA2                                        | Negative | NL       | t002    | r26r23r17r34r17r20r17r12r17r16 |
| 620               | 2007          | CMRSA2                      | CMRSA2                                        | Negative | NL       | t002    | r26r23r17r34r17r20r17r12r17r16 |
| 546               | 2007          | CMRSA2                      | CMRSA2                                        | Negative | NL       | t002    | r26r23r17r34r17r20r17r12r17r16 |
| 731               | 2007          | CMRSA4                      | CMRSA4                                        | Negative | NL       | t012    | r15r12r16r02r16r02r25r17r24r24 |
| 552               | 2007          | CMRSA2                      | CMRSA2                                        | Negative | NL       | t045    | r26r17r20r17r12r17r16          |
| 18                | 2007          | CMRSA2                      | CMRSA2                                        | Negative | NL       | t002    | r26r23r17r34r17r20r17r12r17r16 |
